# Supplementary material for: RUNX1-ETO Depletion in t(8;21) AML Leads to C/EBPα- and AP-1-Mediated Alterations in Enhancer-Promoter Interaction
Source: PubMed Central journal article supplement (PMC6899442; doi:10.1016/j.celrep.2019.08.040), 2019-09-17
Supplement: mmc1.pdf [file mmc1.pdf]

**Cell Reports, Volume 28**

**Supplemental Information**

**RUNX1-ETO Depletion in t(8;21) AML Leads to  
C/EBP $\alpha$ - and AP-1-Mediated Alterations in  
Enhancer-Promoter Interaction**

**Anetta Ptasinska, Anna Pickin, Salam A. Assi, Paulynn Suyin Chin, Luke Ames, Roberto Avellino, Stefan Gröschel, Ruud Delwel, Peter N. Cockerill, Cameron S. Osborne, and Constanze Bonifer**

Figure 1 supplementary

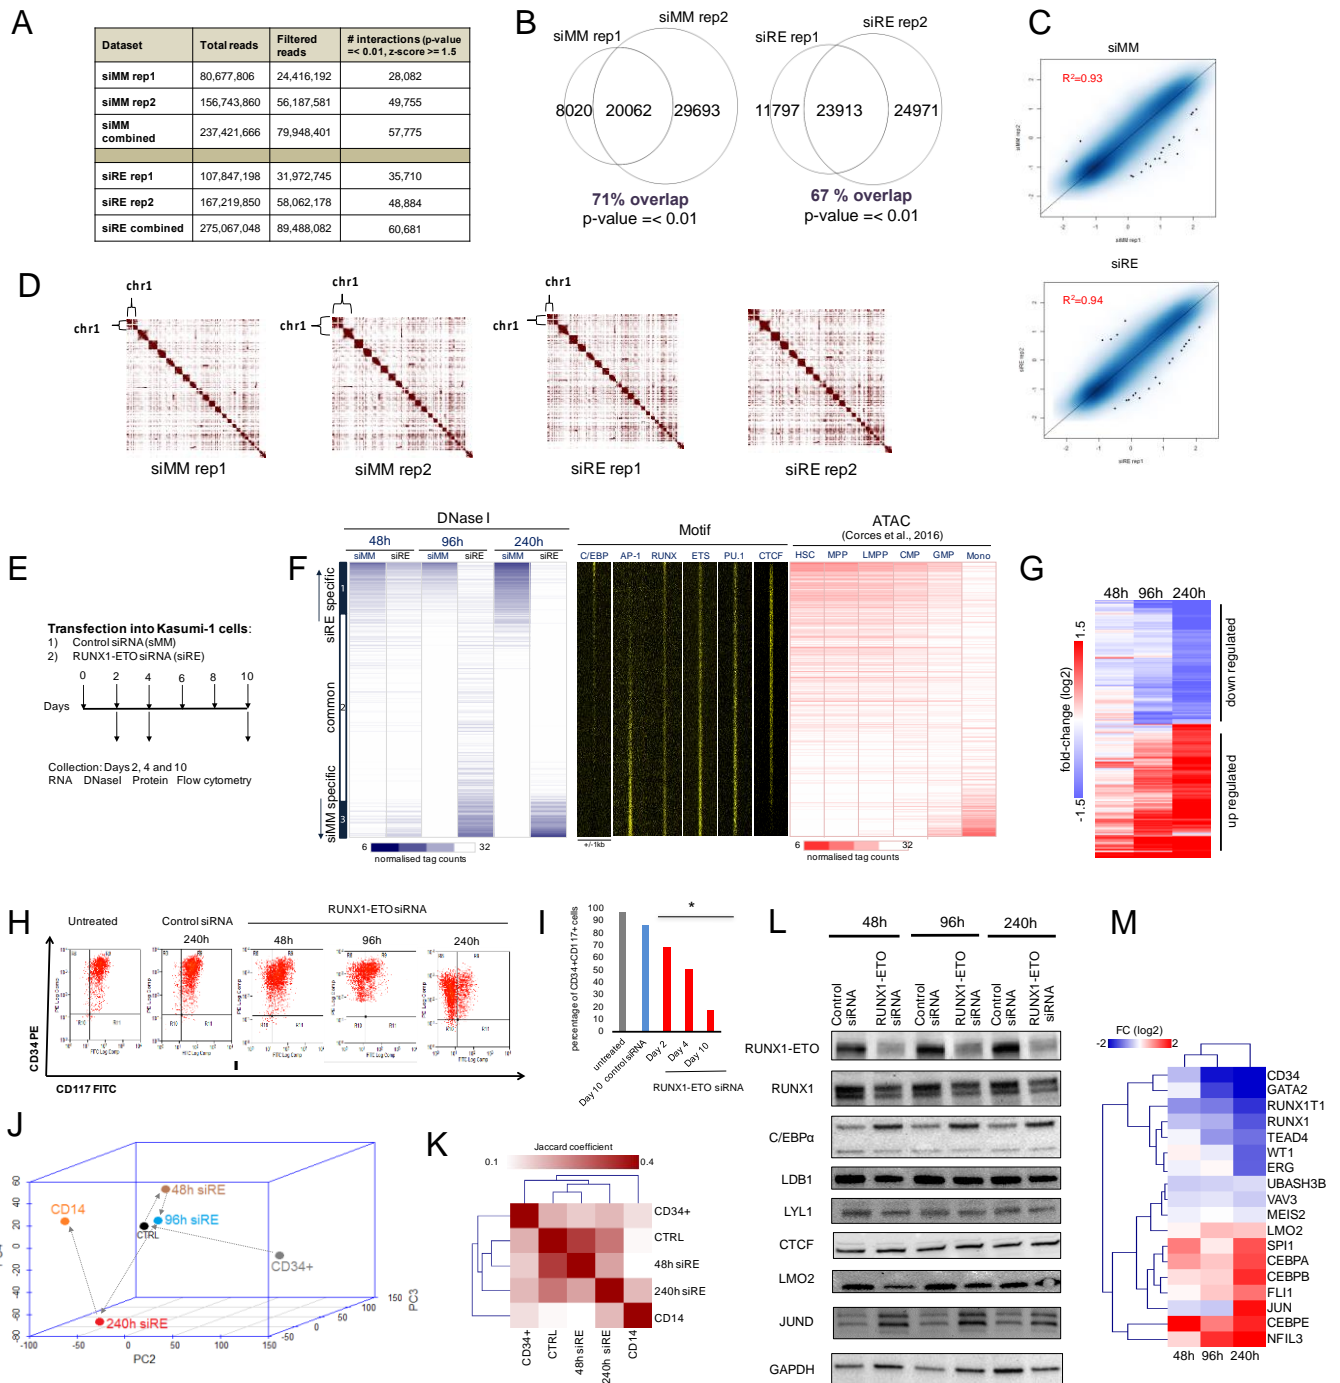

Supplemental Figure 1 (refers to Figure 1)

### RUNX1-ETO depletion changes local cis-regulatory element interactions

**A:** The number of high confidence reads associated within open chromatin regions for two independent Capture HiC experiments from control (siMM) and RUNX1-ETO depleted (siRE) cells and.

**B:** 2-way Venn diagram showing the overlap of interactions between Capture HiC replicates.

**C:** Smooth scatter plot showing the correlation between capture HiC replicates based on first principle component analysis.

**D:** Contact matrix across the whole genome. Each pixel represents a 10 Mb section of the genome. Colour intensity represents the interaction frequency. Left hand plots show the interaction matrices generated with data from Kasumi-1 cells transfected with siMM for four days (biological replicate 1 and 2). Right hand plots show the interaction matrices generated with data from Kasumi-1 cells transfected with siRE for four days (biological replicate 1 and 2). Interaction data was generated by Capture HiC.

**E:** Experimental strategy of RUNX1-ETO knockdown in Kasumi-1 cells. Transfection with either control siRNA or RUNX1-ETO siRNA on days 0, 2, 4, 6 or 8 in Kasumi-1 cells. Cells were collected for RNA, chromatin, DNase I or flow cytometry on designated days.

**F:** Left panel: Time course of DHS development after 2, 4 and 10 days of RUNX1-ETO depletion (see scheme in Figure S1E). Normalised tag counts (high: light blue, low, dark blue) are ranked alongside those of day 10 knock-down (KD) and control-specific (bottom), common and knock-down specific DHS are indicated on the left. Plotted alongside the same genomic coordinates are the distributions of AP1, C/EBP, ETS, RUNX1, E-box and CTCF motifs enriched in Kasumi-1 cells aligned to the summit of the day 10 DHSs (middle panel). The outermost right panels show ATAC-seq reads from normal hematopoietic precursor cells (HSC, MPP, LMPP, CMP, GMP) or monocytes (Mono) from the corresponding interacting region plotted along-side.

**G:** Heatmap depicting genes differentially expressed during a time-course of 2, 4 and 10 days on RUNX1-ETO depletion ranked alongside up-and down regulated genes at day 10 of depletion.

**H:** RUNX1-ETO siRNA treatment in Kasumi-1 cells results in reduction in CD34 surface expression. Kasumi-1 cells after 2, 4 and 10 days of either RUNX1-ETO or control siRNA transfection were stained with CD34-PE and CD117 FITC. Representative flow cytometry plot of 3 independent experiments

**I:** Percentage of CD34+CD117+ cells. Mean of 3 independent experiments and error bars represent S.E.M. \* denotes  $p < 0.05$  by paired t-test.

**J:** Principal component analysis with union of DHSs showing that the depletion of RUNX1-ETO leads to changes in the DHS profile of Kasumi-1 cells during 2, 4 and 10 days of RUNX1-ETO depletion.

**K:** Hierarchical clustering of Jaccard index/coefficient showing the similarity / differences in the footprint patterns.

**L:** Western blot analyses of protein extracts from: t(8;21) Kasumi-1 cells (transfected with control siRNA or RUNX1-ETO siRNA). Western blots were probed with either an anti-ETO, an anti-RUNX1 (N-terminal epitope antibody) and anti-C/EBP $\alpha$ , anti-LDB1, anti-LMO2, anti CTCF and anti-JUND antibodies. Anti-GAPDH antibody was used as a loading control.  
Representative western blot of 3 independent experiments

**M:** Fold-change of gene expression during the time course of RUNX1-ETO knock-down for selected genes

Figure S2

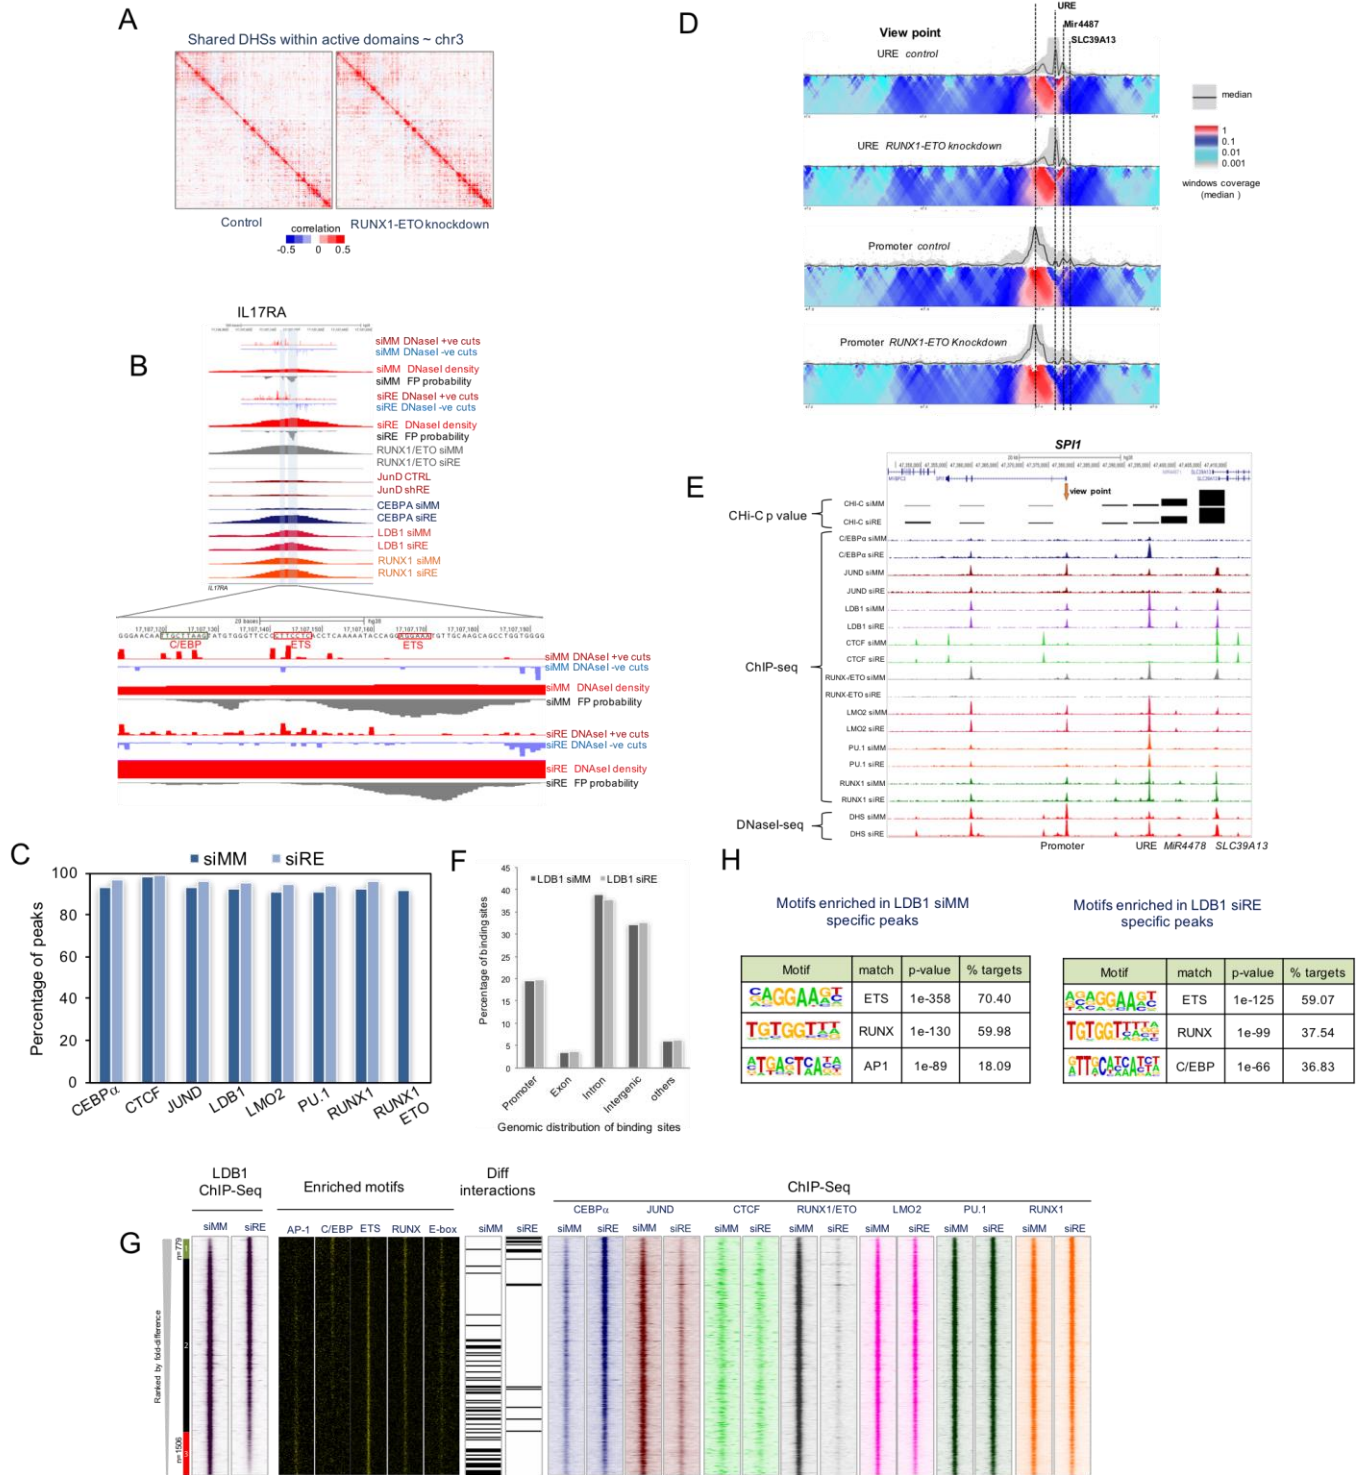

Supplemental Figure 2 (refers to Figure 2)

**LDB1 participates in differential promoter-enhancer interactions after RUNX1-ETO depletion**

**A:** DHS shared between siMM and siRE cells do not show changes in interactions. The heatmap represents the correlation of normalized interaction ratios across chr3 at 5 kb

resolution in DHS peaks shared between control and RUNX1-ETO depleted cells, the left panel shows the interaction heatmap for control and the right panel for knock-down cells. Each pixel represents a 5 kb section of the genome. Positive correlation is shown as red, negative correlation as blue.

**B:** UCSC genome browser screenshot of ChIP-seq and DHS data aligned with digital footprints at the *IL17RA* locus within a DHS shared between siMM and siRE samples. It also shows the binding pattern of RUNX1-ETO, JUND, C/EBP $\alpha$ , LDB1 and RUNX1 in Kasumi-1 cells as determined by ChIP. Footprint probabilities as calculated by Wellington (Piper et al., 2013) are indicated as gray columns below the lines. The bottom indicates the location of occupied ETS, and C/EBP motifs

**C:** Percentage of ChIP-seq high confidence peaks (Ptasinska et al., 2014) which show factor occupancy in digital footprint assays.

**D:** Validation of Chi-C data. The *SPI1* locus does not show any differences in interactions before and after RUNX1-ETO depletion. Validation of Chi-C data and analysis of reproducibility. Local 4C contact profile with a viewpoint from the *SPI1* (PU.1) upstream regulatory element (URE) (upper two panels) and its promoter (lower two panels), using chromatin from Kasumi-1 cells transfected with control siRNA (siMM) RUNX1/ETO specific siRNA (siRE). In the top panel (main trend), the contact intensity (black line) is calculated using a running median analysis of normalized read counts with a 3 kb sliding window. The 20th and 80th percentile are visualized as a grey trend graph. In the bottom panel, contact intensities are computed using linearly increasing sliding windows (scaled 2–50 kb) and displayed as a color-coded heat map of positive 4C signal (maximum interaction set to 1). Local colour changes are log-scaled to indicate changes of statistical enrichment of captured sequences, corresponding to the enhancer-promoter interaction. The results presented here are an average of two biological replicates.

**E:** The *SPI1* locus does not show any differences in interactions before and after RUNX1-ETO depletion. UCSC browser screenshot depicting interactions between the *SPI1* promoter and surrounding DHS. Interactions are depicted as bars above the distance-dependent threshold level of statistical significance (ChI-C p-Value) together with the indicated ChIP and DHS data before and after RUNX1-ETO knock-down.

**F:** Graph showing the genomic distribution of LDB1 binding sites before and after RUNX1-ETO knock-down.

**G:** LDB1 ChIP-seq profiles ranked from top to bottom in order of decreasing relative DNA sequence tag count. Aligned to these coordinates are indicated enriched motifs and ChIP-

seq data. Column 1-2 represent the LDB-1 peaks from siMM or cells depleted of RUNX1-ETO for 2 days. Alongside, columns show enriched motifs for the TFs AP-1, C/EBP, ETS, RUNX1 and E-box in Kasumi-1 cells aligned to the summit of the LDB1 peaks. Then next columns show a binary representation of Capture HiC differential interactions aligned to the union of LDB1 peaks. Alongside, C/EBP, JUND, CTCF, RUNX1-ETO, LMO2, PU.1 and RUNX1 ChIP reads from Kasumi-1 cells with or without RUNX1-ETO depletion are plotted as indicated.

**H:** Results of de novo motif search of LDB1 specific peaks before and after RUNX1-ETO knock-down

Figure S3

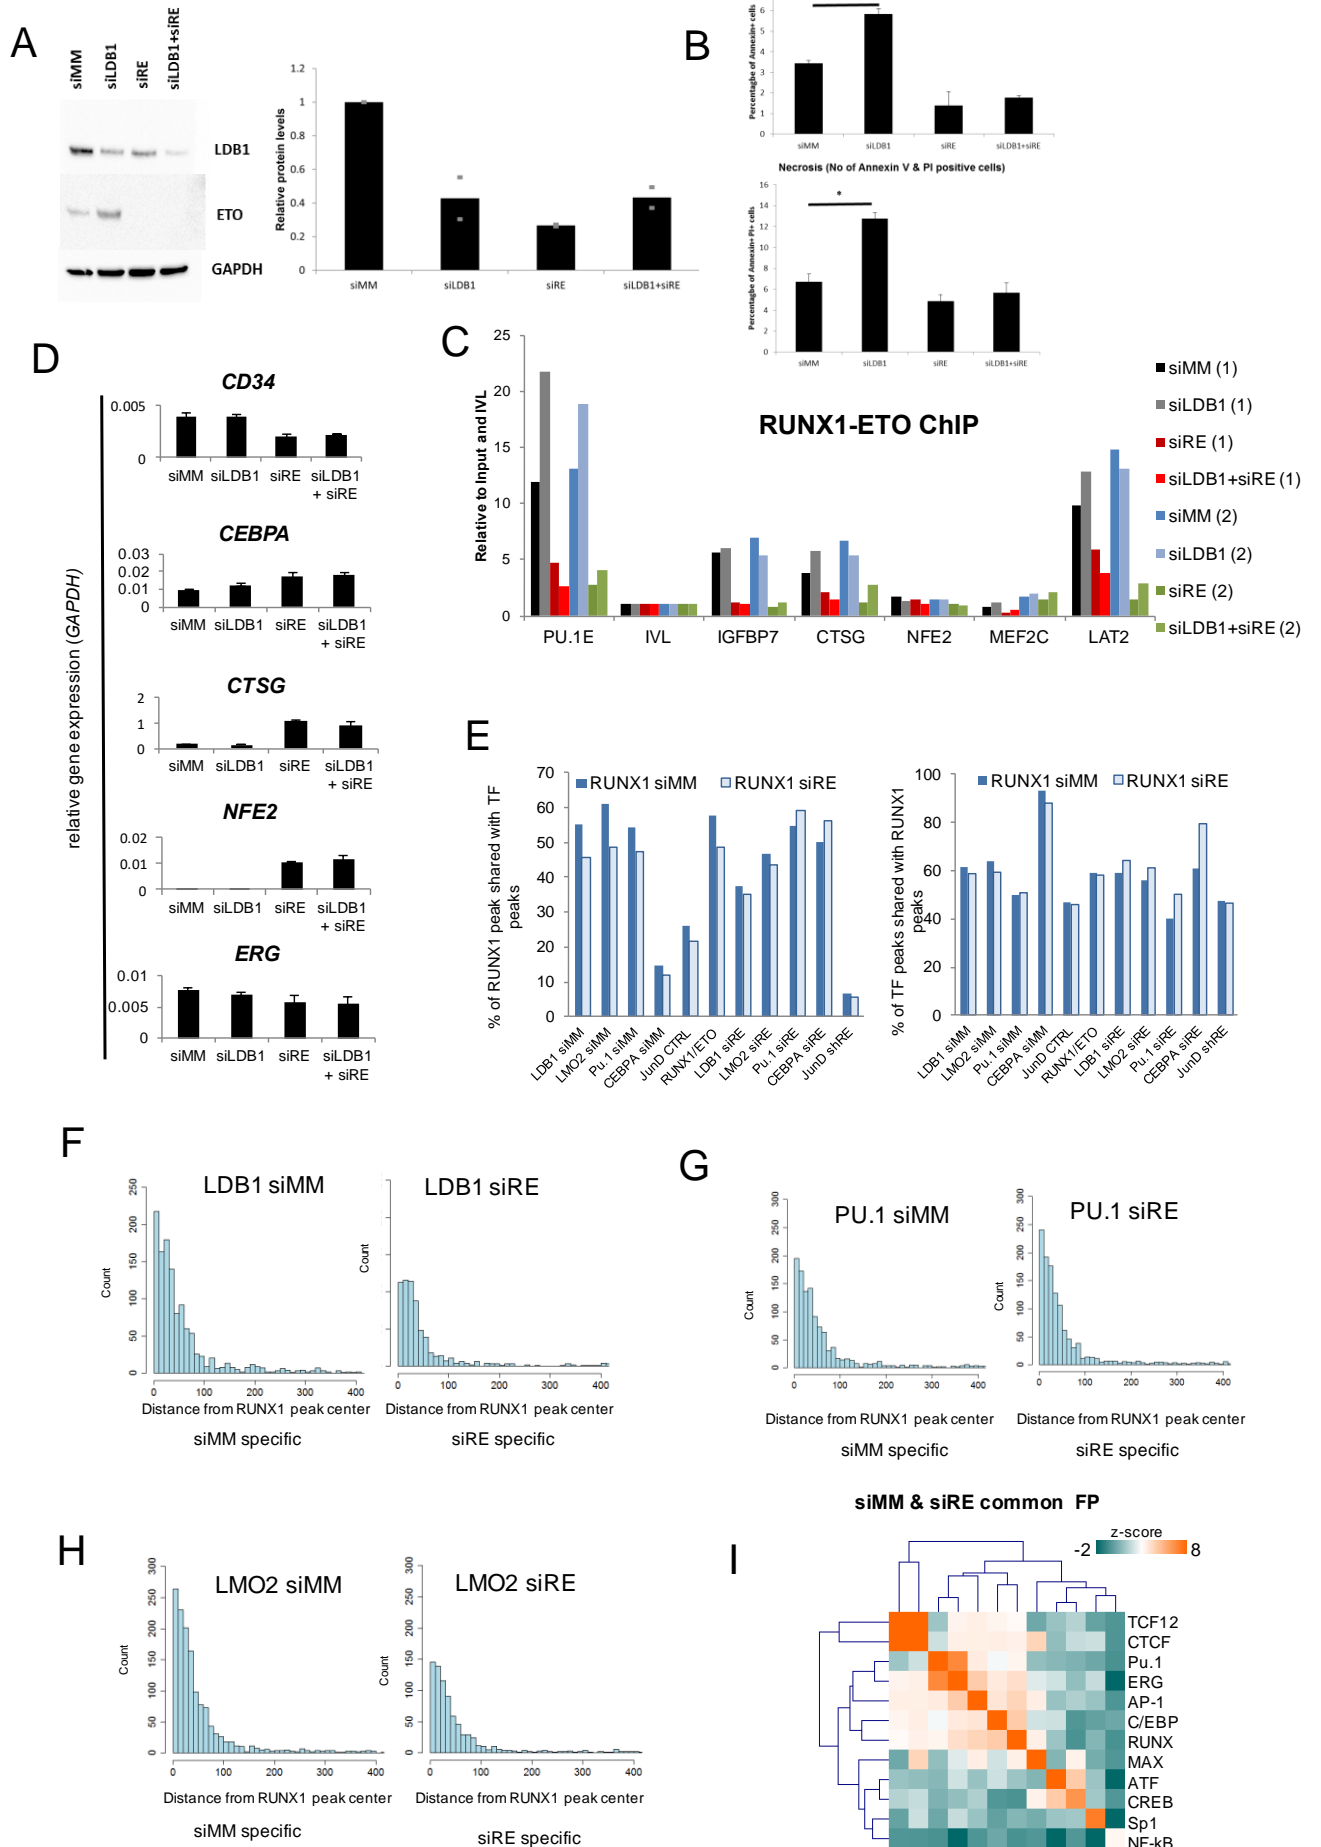



### **Supplemental Figure 3 (refers to Figure 3)**

#### **Colocalization analyses highlight different combinatorial TF binding patterns in control and RUNX1-ETO depleted cells**

**A:** Western blot indicating RUNX1-ETO and LDB1 protein expression levels in single- and double knock-down cells as indicated. An antibody against GAPDH was used as control. The bar plot showing quantification of relative LDB1 protein levels in single- and double knock-down as indicated. The graph on the right shows mean of 2 independent experiment, n=2

**B:** Knock-down of LDB1 leads to cell death. Annexin V and propidium iodide (PI) staining followed by flow cytometry analysis was used to measure cell viability at 10 days after treatment with siRNA. The percentage represents the sum of the proportion of cells positive for Annexin V (top panel) or Annexin V and PI (bottom panel). The graph shows the mean of 3 independent experiment with SD. \* denotes  $p < 0.05$  by paired t-test

**C:** ChiP experiment showing that LDB1 depletion does not prevent RUNX1-ETO binding to distinct classes of RUNX1-ETO binding sites as indicated (n=2, with 2 independent experiments plotted individually)

**D:** LDB1 depletion does not alter the response to RUNX1-ETO knock-down. mRNA levels of the indicated genes 10 days after electroporation with the indicated siRNAs. The graph shows the mean of 3 independent experiment with SD

**E:** Bar plots show the percentage of Chip-peak overlap of other TFs with with RUNX1 peaks. The left plot shows the percentage of RUNX1 peaks that are shared with ChIP-seq peaks for other factors. The right plot shows percentage of ChIP-seq peaks that shared with RUNX1 peaks.

**F, G:** Bar plots illustrated the distribution of distances between RUNX1 ChIP-Seq peaks (before (left) and after (right) R/E KD) and LDB1 ChIP-Seq peaks (E), PU.1 ChIP-Seq peaks (F) and LMO2 ChIP-Seq peaks (G).

**I:** C/EBP and AP-1 motifs do not co-localize in common DHS sites. Bootstrapping analysis of footprinted motifs for DNaseI common DHSs in Kasumi-1 cells. The heatmap shows the significance of co-localizing footprinted motifs clustering together as compared to sampling by chance.

Figure S4

A

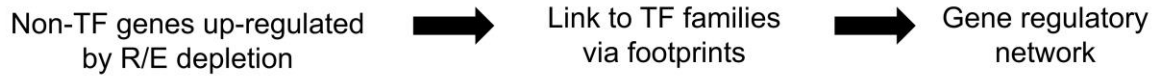

B

Non-TF genes

TF encoding genes

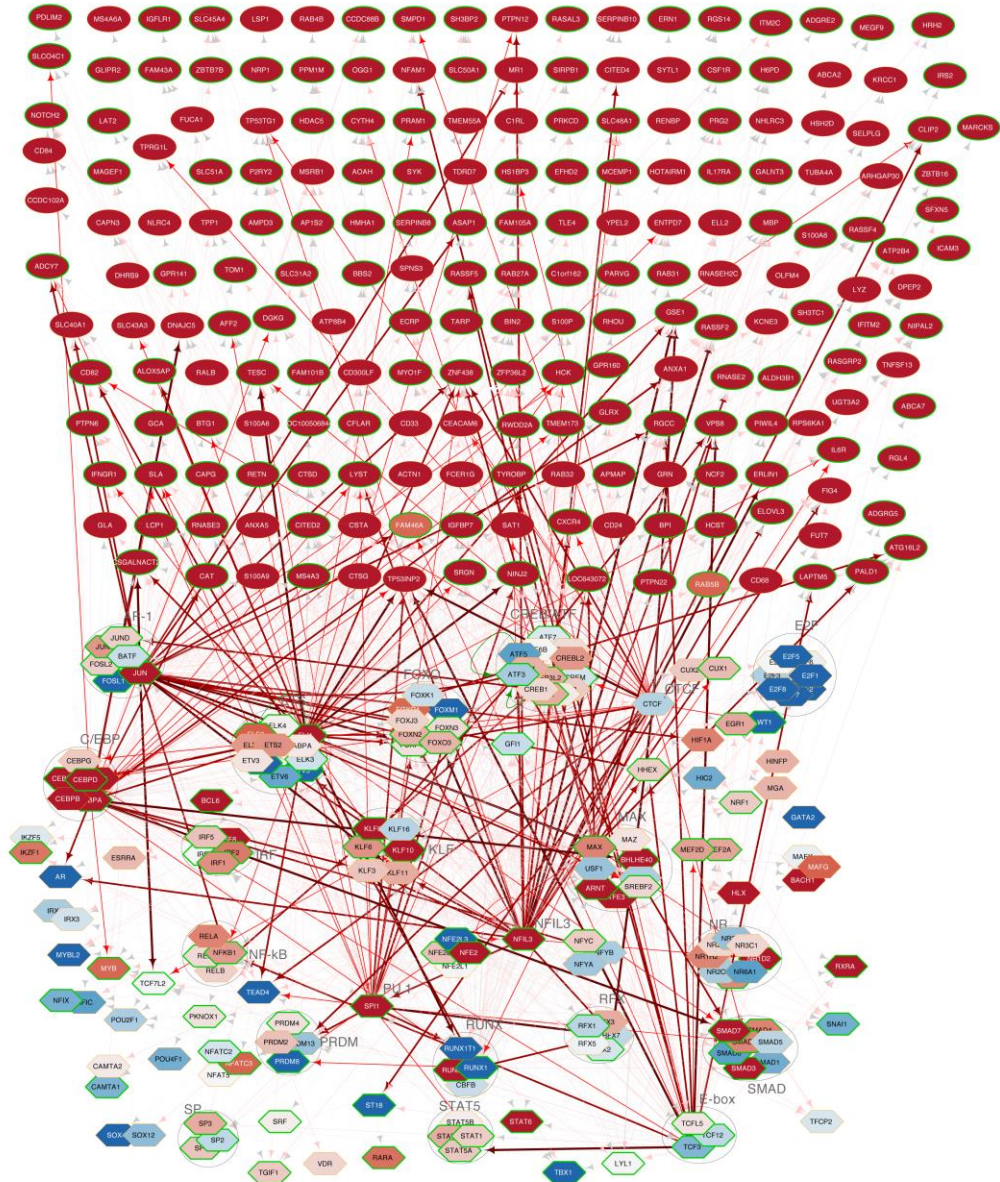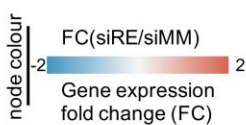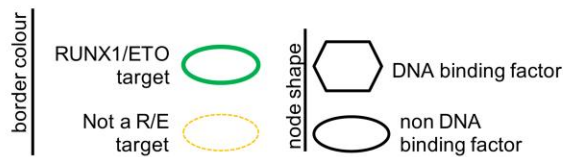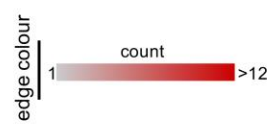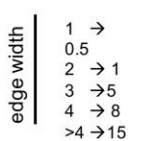

Node and edge attributes

## **Supplemental Figure 4 (refers to Figure 4)**

### **Connections between factors and genes for genes at least two-fold up-regulated by RUNX1-ETO depletion**

- (A) Data analysis strategy. (B) Gene regulatory network of all up-regulated (red) non-transcription factor (effector) genes after 10 days of RUNX1-ETO knock-down (upper rows) connected to genes encoding transcription factor families (lower rows) as determined by digital footprinting and ChIP-C. Arrows going outwards can come from any TF family within a group, incoming arrows are specific for each gene. Bottom panel: node and edge attributes.

Supplemental Tables

| motif    | logo | motif   | logo | motif | logo |
|----------|------|---------|------|-------|------|
| AHR      |      | HSF1    |      | PRDM1 |      |
| AP-1     |      | IKZF    |      | PU.1  |      |
| AR       |      | IRF     |      | RAR   |      |
| BCL6     |      | IRX     |      | RFX   |      |
| CAMTA    |      | KLF     |      | RUNX  |      |
| C/EBP    |      | LEF1    |      | RXR   |      |
| CREB/ATF |      | MAF     |      | SMAD  |      |
| CTCF     |      | MYC/MAX |      | SNAI  |      |
| CUT      |      | MEF2    |      | SOX   |      |
| E2F      |      | MEIS    |      | SP1   |      |
| EGR      |      | MYB     |      | SRF   |      |
| ESRRA    |      | NF1     |      | ST18  |      |
| ETS      |      | NFAT    |      | STAT3 |      |
| FOX      |      | NFE2    |      | STAT5 |      |
| GATA     |      | NFIL3   |      | STAT6 |      |
| GFI1     |      | NF-kB   |      | TAL1  |      |
| GLI      |      | NFY     |      | TCF3  |      |
| HES      |      | NKX     |      | TEAD  |      |
| HHEX     |      | NR      |      | TFCP2 |      |
| HIC1     |      | NRF1    |      | TFDP1 |      |
| HIF1A    |      | OCT     |      | TGIF  |      |
| HINFP    |      | PKNOX1  |      | XBP1  |      |
|          |      | POU4F1  |      |       |      |

**Table S1.** Curated position weight matrices used for motifs shared between transcription factor families as described in (Assi et al., 2018). Related to Figure 2, 3 and 4.

| <b>Oligonucleotides</b>               | <b>Forward</b>               | <b>Reverse</b>                 |
|---------------------------------------|------------------------------|--------------------------------|
| RUNX1-ETO siRNA                       | CCUCGAAAUCGUACUGAG<br>AAG    | UCUCAGUACGAUUUCGAG<br>GUU      |
| <i>PU.1 14 3H (CHIP)</i>              | AACAGGAAGCGCCCAGTC<br>A      | TGTGCGGTGCCTGTGGTA<br>AT       |
| <i>LAT2(CHIP)</i>                     | AAACCCAGAACAACCCAG<br>GC     | ATGAGGAAGGATGTGTGT<br>GCGG     |
| <i>CTSG(CHIP)</i>                     | TCAGTTGCTGCTGTGCTTC          | TTCTCAATCCCCTGTCCCC<br>AC      |
| <i>NFE2(CHIP)</i>                     | AATAGCGAGGCCCTCTT<br>AG      | ACCCAAACTGGAACACAA<br>GG       |
| <i>TBP (CHIP)</i>                     | CTGGCGGAAGTGACATTA<br>TCAA   | GCCAGCGGAAGCGAAGTT<br>A        |
| <i>CH18(CHIP)</i>                     | ACTCCCCTTTCATGCTTCT<br>G     | AGGTCCCAGGACATATCC<br>ATT      |
| <i>MEF2(CHIP)</i>                     | TTATGAGCTGAGCGTGCT<br>GT     | ATCTCACAGGTGCTGGCA<br>TA       |
| <i>IVL(CHIP)</i>                      | GCCGTGCTTTGGAGTTCTT<br>A     | CCTCTGCTGCTGCCACTT             |
| <i>IGFBP7(CHIP)</i>                   | GTCAAGCACTAAAAGGAC<br>AAACCG | TGAATGCCACTGGGAG               |
| <i>GAPDH(cDNA)</i>                    | CCTGGCCAAGGTCATCCA<br>T      | AGGGGCCATCCACAGTCT<br>T        |
| <i>RUNX1/ETO(cDNA)</i>                | TCAAATCACAGTGGATGG<br>GC     | CAGCCTAGATTGCGTCTTC<br>ACA     |
| <i>CTSG(cDNA)</i>                     | TCCTGGTGCGAGAAGACT<br>TTG    | GGTGTTCCTCCGTCTCTGG<br>A       |
| <i>C/EBP<math>\alpha</math>(cDNA)</i> | GAGGGACCGGAGTTATGA<br>CA     | AGACGCGCACATTCACATT            |
| <i>CD34(cDNA)</i>                     | CACTGGCTATTTCTGATG<br>AAT    | CCACCGTTTTCCGTGTAAT            |
| <i>NFE2(cDNA)</i>                     | CCAAGGTGTGTTCAAAGA<br>GGC    | GGAGCCGAGTCAGGGAAG<br>AC       |
| <i>ERG(cDNA)</i>                      | ATGGAGGAGAAGCACATG<br>CC     | ATAGCGTAGGATCTGCTG<br>GC       |
| Actin (short) (DNaseI)                | GCAATGATCTGAGGAGGG<br>AAGGG  | AGCTGTACATCCAGGGT<br>CCTCA N/A |
| TBP promoter (short)<br>(DNaseI)      | CTGGCGGAAGTGACATTA<br>TCAA   | CCCGACCTCACTGAACCC             |
| CH18 (short) (DNaseI)                 | AGGTCCCAGGACATATCC<br>ATT    | GTTCAAATTGTGTTTTGTG<br>GTTA    |
| Actin (long) (DNaseI)                 | GCAATGATCTGAGGAGGG<br>AAGGG  | GTGTCTTTCCTGCCTGAGC<br>TGAC    |
| TBP promoter (long)<br>(DNaseI)       | CTGGCGGAAGTGACATTA<br>TCAA   | GCCAGCGGAAGCGAAGTT<br>A        |

|                                        |                                                                                      |                                                 |
|----------------------------------------|--------------------------------------------------------------------------------------|-------------------------------------------------|
| CH18 (long) (DNaseI)                   | ACTCCCCTTTCATGCTTCT<br>G                                                             | AGGTCCCAGGACATATCC<br>ATT                       |
| SPI1 promoter forward (4C-seq Primers) | AATGATACGGCGACCACC<br>GAACACTCTTTCCTACAC<br>GACGCTCTTCCGATCTAGT<br>GAGGAGCAGTGGCGATC | CAAGCAGAAGACGGCATA<br>CGAACTATGCCCTGGCTC<br>AGA |
| SPI1 URE forward (4C-seq Primers)      | AATGATACGGCGACCACC<br>GAACACTCTTTCCTACAC<br>GACGCTCTTCCGATCTTGT<br>CCAGGGAAGCCCAGATC | CAAGCAGAAGACGGCATA<br>CGATTCACCAGGCACAGA<br>CTT |

**Table S2.** The list of PCR primers used for ChIP, gene expression, validating DNaseI digestion before DNaseI –Seq, viewpoint specific 4C-seq PCR primers. Related to STAR Methods.
